# Supplementary material for: Rare-earth metal diisopropylamide-catalyzed intramolecular hydroamination
Source: Royal Society of Chemistry journal article supplement (doi:10.1039/c6dt03045a), 2016-01-01
Supplement: c6dt03045a1.pdf [file c6dt03045a1.pdf]

## Supporting Information

# Rare-earth metal diisopropylamide- catalyzed intramolecular hydroamination

Tatiana Spallek and Reiner Anwander\*

---

<sup>a</sup> Institut für Anorganische Chemie, Universität Tübingen, Auf der Morgenstelle 18,  
72076 Tübingen, Germany

## Table of Contents

### Experimental Section

|                                                                                                |    |
|------------------------------------------------------------------------------------------------|----|
| Synthesis and characterization of aminoalkene substrates <b>S1</b> , <b>S2</b> , and <b>S3</b> | S3 |
| Characterization of the cyclized amines <b>P1</b> , <b>P2</b> , and <b>P3</b>                  | S4 |
| Isomerized product <b>P4</b>                                                                   | S5 |

### NMR Spectroscopic and Catalytic Data

|                                                                                                                                                                        |    |
|------------------------------------------------------------------------------------------------------------------------------------------------------------------------|----|
| <b>Figure S1.</b> $^1\text{H}$ NMR monitoring of the IHC reaction of <b>S3</b> using 2 mol% $\text{LiY}(\text{NiPr}_2)_4(\text{THF})$ ( <b>1b</b> )                    | S6 |
| <b>Table S1.</b> IHC of aminoalkenes catalyzed by 4 mol% $\text{NaLn}(\text{NiPr}_2)_4(\text{THF})$ ( $\text{Ln} = \text{Sc}$ ( <b>3a</b> ), $\text{Y}$ ( <b>3b</b> )) | S6 |
| <b>Figure S2.</b> Experimental conversion/time data plot for the IHC of aminoalkene <b>S2</b>                                                                          | S7 |

## Experimental Section

### Synthesis and characterization of aminoalkene substrates **S1**, **S2**, and **S3**

All aminoalkenes were prepared according to literature procedures.<sup>1</sup>

#### 1-Amino-2,2-dimethyl-4-pentene (**S1**)

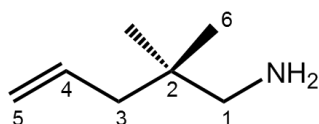

Isolated product: 8.3 g, 0.073 mol, 59% based on 0.124 mol of dimethylacetonitrile.

<sup>1</sup>H NMR (C<sub>6</sub>D<sub>6</sub>, 26 °C, 400.11 MHz): 0.59 (broad s, 2H, NH<sub>2</sub>), 0.75 (s, 6H; Me<sub>2</sub>), 1.89 (dt, 2H, J = 7.4 and 1.3 Hz, CH<sub>2</sub>CH=), 2.27 (s, 2H, NCH<sub>2</sub>), 5.00 (m, 2H, J = 11.5 and 1.4 Hz, CH<sub>2</sub>=), 5.75 (m, 1H, J = 17.8 and 7.5 Hz, CH<sub>2</sub>=CH). <sup>13</sup>C{<sup>1</sup>H} NMR (CDCl<sub>3</sub>, 26 °C, 100.61 MHz): 24.50 (C6), 34.79 (C2), 43.92 (C3), 52.55 (C1), 116.79 (C5), 135.21 (C4).

#### 1-Amino-2,2-diphenyl-4-pentene (**S2**)

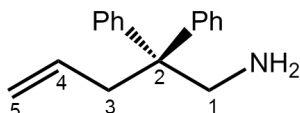

Isolated product: 14.7 g, 0.062 mol, 50% based on 0.124 mol of diphenylacetonitrile.

<sup>1</sup>H NMR (C<sub>6</sub>D<sub>6</sub>, 26 °C, 400.11 MHz): 0.40 (broad s, 2H, NH<sub>2</sub>), 2.87 (dt, 2H, CH<sub>2</sub>CH=), 3.17 (s, 2H, NCH<sub>2</sub>), 4.96 (m, 2H, J = 17.3, 10.3, and 1.4 Hz, CH<sub>2</sub>=), 5.45 (dm, 1H, J = 10.1 Hz, CH<sub>2</sub>=CH), 7.07 (m, 10H, Ph<sub>2</sub>). <sup>13</sup>C{<sup>1</sup>H} NMR (CDCl<sub>3</sub>, 26 °C, 100.61 MHz): 41.1 (C3), 48.7 (C1), 51.5 (C2), 117.7 (C5), 126.1 + 128.3 + 128.6 (C-Ph), 135.3 (C4), and 147.2 (C-Ph).

### 1-Amino-2,2-diphenyl-5-hexene (S3)

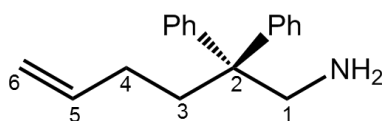

Isolated product: 15.4 g, 0.061 mol, 49% based on 0.124 mol of diphenylacetonitrile.

$^1\text{H}$  NMR ( $\text{C}_6\text{D}_6$ , 26 °C, 400.11 MHz): 0.37 (broad s, 2H,  $\text{NH}_2$ ), 1.90 (m, 2H,  $\text{CH}_2\text{CH}_2\text{CH}=\text{}$ ), 2.32 (m, 2H,  $J = 8.35$  and  $1.1$  Hz,  $\text{CH}_2\text{CH}=\text{}$ ), 3.24 (s, 2H,  $\text{NCH}_2$ ), 5.03 (m, 2H,  $J = 1.8$  and  $1.1$ ,  $\text{CH}_2=\text{}$ ), 5.85 (dm, 1H,  $J = 6.6$  and  $2.9$  Hz,  $\text{CH}_2=\text{CH}$ ), 7.00 (m, 10H,  $\text{Ph}_2$ ).  $^{13}\text{C}\{^1\text{H}\}$  NMR ( $\text{CDCl}_3$ , 26 °C, 100.61 MHz): 29.1 (C3), 35.9 (C4), 49.1 (C1), 51.8 (C2), 114.3 (C6), 126.1 + 128.2 + 128.6 (C-Ph), 139.3 (C5), 147.3 (C-Ph).

### Characterization of the cyclized amines **P1**, **P2**, and **P3**

The NMR resonances of the cyclized amines were assigned by comparison with literature data.<sup>2</sup>

### 2,4,4-Trimethylpyrrolidine (P1)

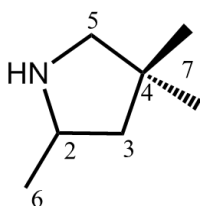

$^1\text{H}$  NMR ( $\text{C}_6\text{D}_6$ , 26 °C, 500.13 MHz): 0.94 (s, 3H, H-7), 0.98 (m, 1H, H-3), 1.02 (s, 3H, H-7), 1.07 (s, 3H, H-6), 1.20 (broad s, 1H, NH), 1.51 (dd, 1H, H-3), 2.53 (d, 1H, H-5), 2.66 (d, 1H, H-5), 3.13 (m, 1H, H-2).  $^{13}\text{C}\{^1\text{H}\}$  NMR ( $\text{C}_6\text{D}_6$ , 26 °C, 100.61 MHz): 18.9 (C6), 27.5 (C7), 39.4 (C4), 47.3 (C3), 49.9 (C2), 56.7 (C5).

## 2-Methyl-4,4-diphenylpyrrolidine (P2)

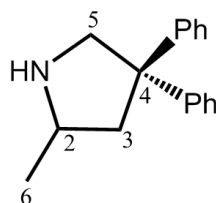

$^1\text{H}$  NMR ( $\text{C}_6\text{D}_6$ , 60 °C, 500.13 MHz): 1.02 (d, 3H, *H*-6), 1.31 (broad s, 1H, *NH*), 1.84 (m, 1H, *H*-3), 2.43 (m, 1H, *H*-3), 3.17 (m, 1H, *H*-2), 3.39 (m, 1H, *H*-5), 3.51 (m, 1H, *H*-5), 7.12 (m, 10H, *Ph*-*H*).  $^{13}\text{C}\{^1\text{H}\}$  NMR ( $\text{C}_6\text{D}_6$ , 26 °C, 100.61 MHz): 22.7 (C6), 47.3 (C3), 53.8 (C2), 57.4 (C4), 58.3 (C5), 126.3 + 126.4 + 127.6 + 127.7 + 128.7 + 128.8 + 148.0 + 148.3 (C-*Ph*).

## 2-Methyl-5,5-diphenylpiperidine (P3)

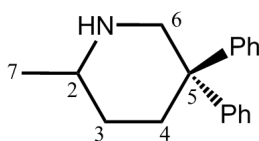

$^1\text{H}$  NMR ( $\text{C}_6\text{D}_6$ , 60 °C, 500.13 MHz): 0.96 (d, 3H, *H*-7), 1.18 - 1.24 (ddt, 1H, *H*-3), 1.45 (dq, 1H, *H*-3), 1.54 (broad s, *NH*), 2.16 (dm, 1H, *H*-4), 2.54 (m, 1H, *H*-4), 2.65 (m, 1H, *H*-2), 3.03 (dd, 1H, *H*-6), 3.86 (dm, 1H, *H*-6), 7.07 - 7.28 (m, 8H, *Ph*-*H*), 7.53 (dm, 2H, *Ph*-*H*). NMR ( $\text{C}_6\text{D}_6$ , 26 °C, 100.61 MHz): 22.8 (C7), 31.5 (C3), 36.4 (C4), 45.8 (C5), 52.4 (C2), 56.8 (C6), 126.9 + 128.7 + 129.2 + 149.7 (C-*Ph*).

## Isomerized product: 1-Amino-2,2-diphenyl-4-hexene (P4)

The NMR resonances were assigned by comparison with literature data.<sup>1b</sup>

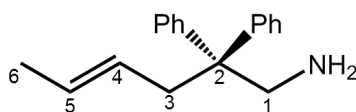

$^1\text{H}$  NMR ( $\text{C}_6\text{D}_6$ , 60 °C, 500.13 MHz): 1.59 (d, 3H, *H*-6,  $J = 6.75$  Hz), 2.92 (d, 2H, *H*-3,  $J = 7.0$  Hz), 3.31 (m, 2H, *H*-1), 5.31 (m, 1H, *H*-4), 5.52 (m, 1H, *H*-5), 7.2 (m, 10H, *Ph*-*H*).

## NMR Spectroscopic and Catalytic Data

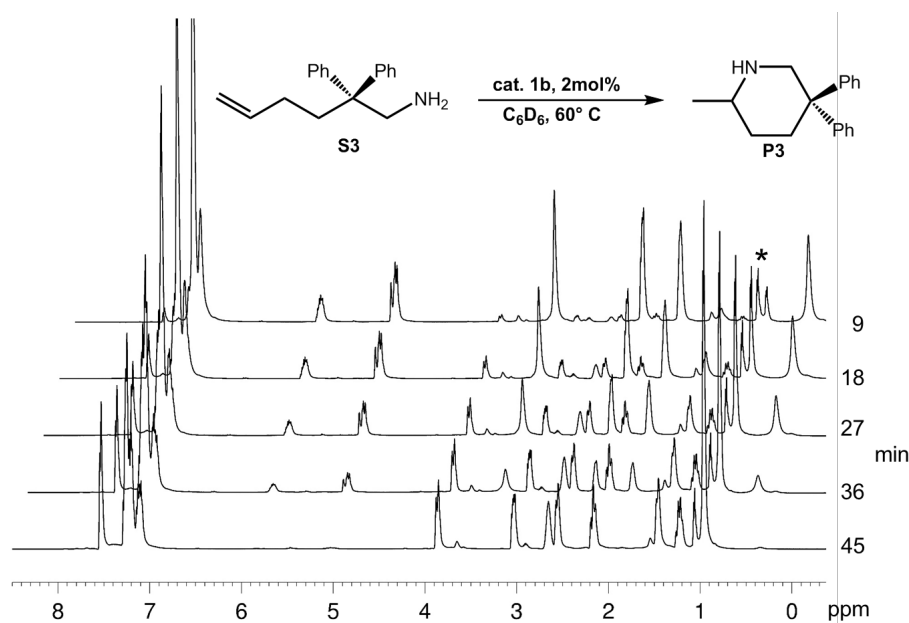

**Figure S1.**  $^1\text{H}$  NMR monitoring (500.13 MHz) of the IHC reaction of substrate **S3** using 2 mol%  $\text{LiY}(\text{NiPr}_2)_4(\text{THF})$  (**1b**) as a precatalyst at 60 °C in  $\text{C}_6\text{D}_6$  (cf., Table 1, entry 14). \* Signal of liberated  $\text{HNiPr}_2$ .

**Table S1.** IHC of aminoalkenes catalyzed by 4 mol%  $\text{NaLn}(\text{NiPr}_2)_4(\text{THF})$  ( $\text{Ln} = \text{Sc}$  (**3a**),  $\text{Y}$  (**3b**)) at 60 °C in  $\text{C}_6\text{D}_6$ .

| entry | aminoalkene | product | catalyst  | $t/\text{h}$ | conv./ % <sup>a</sup> | $N_t/\text{h}^{-1}$ <sup>b</sup> |
|-------|-------------|---------|-----------|--------------|-----------------------|----------------------------------|
| 1     |             |         | <b>3a</b> | 24           | traces                | -                                |
| 2     |             |         | <b>3b</b> | 3            | 37                    | 3.1                              |
| 3     |             |         | <b>3a</b> | 24           | traces                | -                                |
| 4     |             |         | <b>3b</b> | 3            | 15                    | 1.25                             |

<sup>a</sup> All conversion data were derived from  $^1\text{H}$  NMR spectra referring to the corresponding duration of reaction; <sup>b</sup>  $N_t$  at time  $t$  given in this table.

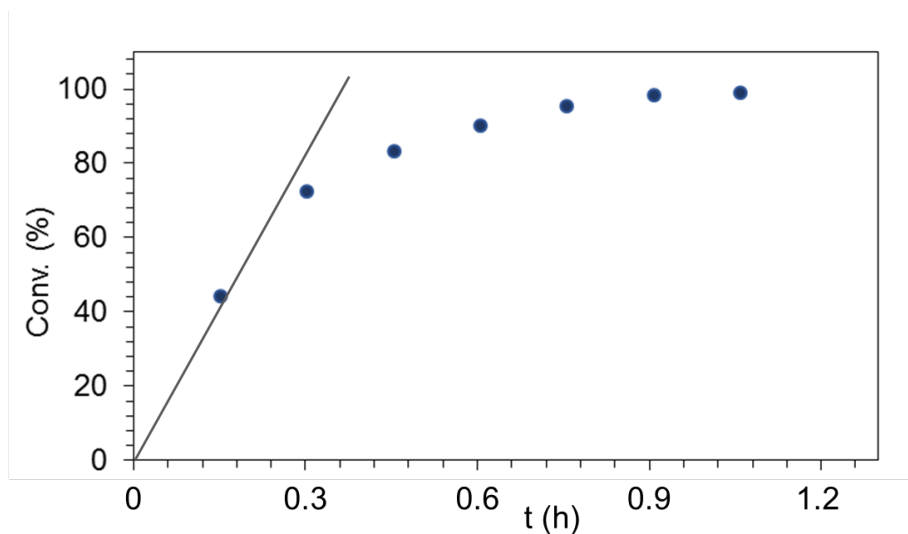

**Figure S2.** Experimental conversion/time data plot for the IHC of aminoalkenes **S2** at 26°C using 4 mol%  $[\text{LiY}(\text{NiPr}_2)_4]_n$  (**2**) as precatalyst and tetrakis(p-tolyl)silane as an internal standard, initial  $N_t = 62.4 \text{ h}^{-1}$ , overall  $N_t$  at 80% conversion =  $45.9 \text{ h}^{-1}$ .

## References

- (a) Y. Tamaru, M. Hojo, H. Higashimura and Z. Yoshida, *J. Am. Chem. Soc.*, 1988, **110**, 3994;  
 (b) M. R. Crimmin, M. Arrowsmith, A. G. M. Barrett, I. J. Casely, M. S. Hill and P. A. Procopiou, *J. Am. Chem. Soc.*, 2009, **131**, 9670.
- M. Arrowsmith, M. R. Crimmin, A. G. M. Barrett, M. S. Hill, G. Kociok-Köhn and P. A. Procopiou, *Organometallics*, 2011, **30**, 1493.
